# Supplementary material for: Diversity protects plant communities against generalist molluscan herbivores
Source: PubMed Central journal article supplement (PMC3492773; doi:10.1002/ece3.359), 2012-08-31
Supplement: ece30002-2460-SD1.pdf [file ece30002-2460-SD1.pdf]

# Diversity protects plant communities against generalist molluscan herbivores

Yvonne Fabian, Nadine Sandau, Odile T. Bruggisser, Patrik Kehrli, Alexandre Aebi, Rudolf P. Rohr, Russell E. Naisbit and Louis-Félix Bersier

## Appendix

Table S1. Wildflower species composition and cover.

Table S2. Mollusc abundance in relation to the meteorological data.

Table S3. Body mass analysis of the three most abundant mollusc species.

Figure S1. Abundances of the molluscs *A. lusitanicus*, *D. panormitanum*, *D. reticulatum* and mollusc egg abundance in the mollusc treatments.

**Table S1)** Wildflower species composition and cover. Internal = sown plants from the Swiss wildflower mixture. External = other species that were found in the experimental wildflower strips. Functional groups: TalH = tall herbs; SmlH = small herbs; Leg = legumes, SmlT = small trees and Grass = grasses. The numbers of plots the plant occurred in and the mean cover (%) are given for the years 2007, 2008 and 2009. Internal plant species in grey were not used in the fence experiments. All 24 internal plant species were sown in the conventional wildflower mixture plots.

| Plant species                              | Internal or External | Functional group | Number of plots in |      |      | Mean cover in |       |       |
|--------------------------------------------|----------------------|------------------|--------------------|------|------|---------------|-------|-------|
|                                            |                      |                  | 2007               | 2008 | 2009 | 2007          | 2008  | 2009  |
| <i>Achillea millefolium</i> L.             | Int                  | TalH             | 96                 | 120  | 113  | 3.4           | 6.8   | 4.4   |
| <i>Agrostemma githago</i> L.               | Int                  | TalH             | 76                 | 24   | 16   | 3.2           | 0.2   | 0.02  |
| <i>Anthemis tinctoria</i> L.               | Int                  | TalH             | 83                 | 100  | 98   | 4.0           | 6.4   | 6.4   |
| <i>Centaurea cyanus</i> L.                 | Int                  | TalH             | 91                 | 10   | 0    | 8.0           | 0.1   | 0     |
| <i>Centaurea jacea</i> L.                  | Int                  | TalH             | 99                 | 118  | 116  | 6.6           | 9.8   | 14.4  |
| <i>Cichorium intybus</i> L.                | Int                  | TalH             | 101                | 113  | 59   | 18.7          | 17.6  | 1.0   |
| <i>Daucus carota</i> L.                    | Int                  | TalH             | 107                | 121  | 79   | 9.6           | 6.8   | 1.1   |
| <i>Dipsacus fullonum</i> L.                | Int                  | TalH             | 96                 | 117  | 140  | 8.6           | 11.1  | 19.3  |
| <i>Echium vulgare</i> L.                   | Int                  | TalH             | 88                 | 105  | 53   | 7.6           | 6.3   | 0.3   |
| <i>Fagopyrum esculentum</i> Moench         | Int                  | SmlH             | 19                 | 3    | 0    | 0.6           | 0     | 0     |
| <i>Hypericum perforatum</i> L.             | Int                  | TalH             | 47                 | 94   | 96   | 0.2           | 1.4   | 3.0   |
| <i>Legusia speculum-veneris</i> (L.) Chaix | Int                  | SmlH             | 10                 | 0    | 0    | 0.04          | 0     | 0     |
| <i>Leucanthemum vulgare</i> Lam.           | Int                  | TalH             | 86                 | 95   | 90   | 2.6           | 5.8   | 7.1   |
| <i>Malva moschata</i> L.                   | Int                  | TalH             | 87                 | 99   | 111  | 3.3           | 3.7   | 4.9   |
| <i>Malva sylvestris</i> L.                 | Int                  | TalH             | 103                | 97   | 64   | 3.8           | 1.7   | 0.8   |
| <i>Melilotus albus</i> Medik.              | Int                  | Leg              | 20                 | 24   | 20   | 0.1           | 0.05  | 0.8   |
| <i>Onobrychis vicifolia</i> Scop.          | Int                  | Leg              | 11                 | 10   | 7    | 0.09          | 0.06  | 0.02  |
| <i>Origanum vulgare</i> L.                 | Int                  | TalH             | 68                 | 98   | 108  | 0.6           | 2.4   | 7.6   |
| <i>Papaver rhoeas</i> L.                   | Int                  | TalH             | 90                 | 40   | 16   | 0.9           | 0.4   | 0.2   |
| <i>Pastinaca sativa</i> L.                 | Int                  | TalH             | 40                 | 51   | 75   | 0.2           | 0.8   | 1.5   |
| <i>Silene latifolia</i> Poir.              | Int                  | TalH             | 90                 | 117  | 108  | 1.8           | 3.4   | 2.2   |
| <i>Tanacetum vulgare</i> L.                | Int                  | TalH             | 96                 | 109  | 106  | 2.2           | 4.0   | 6.1   |
| <i>Verbascum lychnitis</i> L.              | Int                  | TalH             | 45                 | 65   | 90   | 0.5           | 1.2   | 1.9   |
| <i>Verbascum thapsus</i> L.                | Int                  | TalH             | 77                 | 91   | 61   | 2.0           | 1.6   | 0.5   |
| <i>Acer pseudoplatanus</i> L.              | Ext                  | SmlT             | 1                  | 5    | 6    | 0             | 0     | 0.001 |
| <i>Aethusa cynapium</i> L.                 | Ext                  | TalH             | 21                 | 23   | 0    | 0.07          | 0.2   | 0     |
| <i>Agrostis stolonifera</i> L.             | Ext                  | Grass            | 0                  | 47   | 0    | 0             | 0.8   | 0     |
| <i>Althea officinalis</i> L.               | Ext                  | TalH             | 1                  | 0    | 3    | 0             | 0     | 0     |
| <i>Amaranthus lividus</i> L.               | Ext                  | TalH             | 20                 | 0    | 0    | 0.03          | 0     | 0     |
| <i>Amaranthus retroflexus</i> L.           | Ext                  | TalH             | 99                 | 10   | 0    | 0.6           | 0.007 | 0     |
| <i>Anagallis arvensis</i> L.               | Ext                  | SmlH             | 71                 | 35   | 10   | 0.3           | 0.2   | 0.003 |
| <i>Apera spica-venti</i> (L.) P.Beauv.     | Ext                  | Grass            | 9                  | 1    | 68   | 0.007         | 0.05  | 1.9   |
| <i>Arrhenatherum elatius</i> (L.) P.Beauv. | Ext                  | Grass            | 2                  | 8    | 43   | 0.009         | 0.1   | 2.6   |
| <i>Borago officinalis</i> L.               | Ext                  | TalH             | 0                  | 0    | 4    | 0             | 0     | 0     |
| <i>Brassica</i> sp. 1                      | Ext                  | TalH             | 1                  | 0    | 0    | 0.001         | 0     | 0     |
| <i>Brassica</i> sp. 2                      | Ext                  | TalH             | 9                  | 0    | 0    | 0.08          | 0     | 0     |
| <i>Brassica napus</i> L.                   | Ext                  | TalH             | 33                 | 1    | 0    | 0.4           | 0     | 0     |

| Table S1 <i>continued</i><br>Plant species  | Internal<br>or<br>External | Func-<br>tional<br>group | Number of plots in |      |      | Mean cover in |       |       |
|---------------------------------------------|----------------------------|--------------------------|--------------------|------|------|---------------|-------|-------|
|                                             |                            |                          | 2007               | 2008 | 2009 | 2007          | 2008  | 2009  |
| <i>Bromus</i> sp.                           | Ext                        | Grass                    | 4                  | 0    | 0    | 0.03          | 0     | 0     |
| <i>Campanula patula</i> L.                  | Ext                        | TalH                     | 0                  | 1    | 0    | 0             | 0.02  | 0     |
| <i>Capsella bursa-pastoris</i> (L.) Medik.  | Ext                        | SmlH                     | 107                | 12   | 0    | 1.0           | 0.03  | 0     |
| <i>Cardamine pratensis</i> L.               | Ext                        | TalH                     | 0                  | 0    | 5    | 0.0           | 0     | 0.006 |
| <i>Centaureum erythraea</i> Rafn            | Ext                        | SmlH                     | 0                  | 0    | 1    | 0             | 0     | 0     |
| <i>Cerastium</i> sp.                        | Ext                        | SmlH                     | 22                 | 22   | 5    | 0.1           | 0.1   | 0.0   |
| <i>Chamomilla suaveolens</i>                | Ext                        | TalH                     | 69                 | 0    | 0    | 1.6           | 0     | 0     |
| <i>Chaenorhinum minus</i> (L.) Lange        | Ext                        | SmlH                     | 18                 | 8    | 0    | 0.02          | 0.02  | 0     |
| <i>Chamomilla recutita</i> (L.) Rauschert   | Ext                        | TalH                     | 41                 | 17   | 3    | 0.2           | 0.06  | 0.001 |
| <i>Chenopodium album</i> L.                 | Ext                        | TalH                     | 106                | 23   | 8    | 1.1           | 0.7   | 0.05  |
| <i>Chenopodium polyspermum</i> L.           | Ext                        | TalH                     | 106                | 18   | 5    | 3.5           | 0.4   | 0.0   |
| <i>Chenopodium</i> sp.                      | Ext                        | TalH                     | 26                 | 23   | 13   | 0.08          | 2.5   | 0.1   |
| <i>Circea lutetiana</i> L.                  | Ext                        | SmlH                     | 22                 | 33   | 41   | 0.3           | 0.5   | 1.5   |
| <i>Cirsium arvense</i> (L.) Scop.           | Ext                        | TalH                     | 0                  | 0    | 1    | 0             | 0     | 0.001 |
| <i>Cirsium vulgare</i> (Savi) Ten.          | Ext                        | TalH                     | 0                  | 0    | 3    | 0             | 0     | 0     |
| <i>Clematis vitalba</i> L.                  | Ext                        | SmlH                     | 0                  | 0    | 1    | 0             | 0     | 0     |
| <i>Convolvulus arvensis</i> L.              | Ext                        | SmlH                     | 5                  | 13   | 16   | 0.003         | 0.1   | 0.1   |
| <i>Conyza canadensis</i> (L.) Cronquist     | Ext                        | TalH                     | 0                  | 29   | 54   | 0             | 0.3   | 1.2   |
| <i>Cornus sanguinea</i> L.                  | Ext                        | TalH                     | 3                  | 0    | 15   | 0             | 0     | 0.05  |
| <i>Coronilla</i> sp.                        | Ext                        | Leg                      | 0                  | 0    | 1    | 0             | 0     | 0.006 |
| <i>Crepis biennis</i> L.                    | Ext                        | TalH                     | 1                  | 3    | 1    | 0             | 0     | 0     |
| <i>Dactylis glomerata</i> L.                | Ext                        | Grass                    | 11                 | 27   | 75   | 0.04          | 0.3   | 1.9   |
| <i>Deschampsia flexuosa</i> (L.) Trin.      | Ext                        | Grass                    | 0                  | 0    | 3    | 0             | 0     | 0.1   |
| <i>Digitaria sanguinalis</i> (L.) Scop.     | Ext                        | Grass                    | 2                  | 3    | 0    | 0.0           | 0     | 0     |
| <i>Echinochloa crus-galli</i> (L.) P.Beauv. | Ext                        | Grass                    | 119                | 71   | 27   | 6.0           | 1.7   | 0.03  |
| <i>Elymus repens</i> (L.) Gould             | Ext                        | Grass                    | 7                  | 51   | 95   | 0.05          | 1.5   | 5.9   |
| <i>Epilobium hirsutum</i> L.                | Ext                        | TalH                     | 0                  | 0    | 3    | 0             | 0     | 0     |
| <i>Epilobium</i> sp. 1                      | Ext                        | TalH                     | 21                 | 100  | 93   | 0.01          | 0.8   | 3.4   |
| <i>Epilobium</i> sp. 2                      | Ext                        | TalH                     | 0                  | 0    | 91   | 0             | 0     | 3.5   |
| <i>Equisetum arvense</i> L.                 | Ext                        | Grass                    | 29                 | 24   | 24   | 1.2           | 0.9   | 0.5   |
| <i>Erigeron annuus</i> (L.) Pers.           | Ext                        | TalH                     | 0                  | 1    | 8    | 0             | 0     | 0     |
| <i>Euphorbia amygdaloides</i> L.            | Ext                        | TalH                     | 1                  | 0    | 0    | 0             | 0     | 0     |
| <i>Euphorbia exigua</i> L.                  | Ext                        | SmlH                     | 3                  | 0    | 0    | 0.002         | 0     | 0     |
| <i>Euphorbia helioscopia</i> L.             | Ext                        | TalH                     | 6                  | 10   | 4    | 0.01          | 0.02  | 0     |
| <i>Euphorbia stricta</i> L.                 | Ext                        | TalH                     | 0                  | 13   | 1    | 0             | 0.2   | 0     |
| <i>Fallopia convolvulus</i> (L.) A. Löwe    | Ext                        | SmlH                     | 2                  | 33   | 8    | 0.002         | 0.1   | 0.007 |
| <i>Festuca</i> sp.                          | Ext                        | Grass                    | 0                  | 2    | 10   | 0             | 0.001 | 0.2   |
| <i>Filaginella uliginosa</i> (L.) Opiz      | Ext                        | SmlH                     | 19                 | 6    | 0    | 0.05          | 0.008 | 0     |
| <i>Fragaria</i> sp.                         | Ext                        | SmlH                     | 0                  | 1    | 0    | 0             | 0     | 0     |
| <i>Galinsoga ciliata</i> (Raf.) S.F.Blake   | Ext                        | SmlH                     | 16                 | 3    | 0    | 0.09          | 0     | 0     |
| <i>Galium album</i> Miller                  | Ext                        | TalH                     | 0                  | 5    | 9    | 0             | 0.001 | 0.03  |
| <i>Galium aparine</i> L.                    | Ext                        | SmlH                     | 25                 | 14   | 15   | 0.1           | 0.04  | 0.02  |
| <i>Geranium dissectum</i> L.                | Ext                        | SmlH                     | 4                  | 0    | 0    | 0.001         | 0     | 0     |
| <i>Geranium rotundifolium</i> L.            | Ext                        | SmlH                     | 3                  | 11   | 9    | 0.009         | 0.05  | 0.01  |
| <i>Geum urbanum</i> L.                      | Ext                        | TalH                     | 0                  | 0    | 5    | 0             | 0     | 0     |

| Table S1 <i>continued</i><br>Plant species | Internal<br>or<br>External | Func-<br>tional<br>group | Number of plots in |      |      | Mean cover in |       |       |
|--------------------------------------------|----------------------------|--------------------------|--------------------|------|------|---------------|-------|-------|
|                                            |                            |                          | 2007               | 2008 | 2009 | 2007          | 2008  | 2009  |
| <i>Glechoma hederacea</i> L.               | Ext                        | SmlH                     | 3                  | 6    | 7    | 0.001         | 0.001 | 0.1   |
| Grass sp.1                                 | Ext                        | Grass                    | 0                  | 4    | 0    | 0             | 0.2   | 0     |
| Grass sp.2                                 | Ext                        | Grass                    | 9                  | 0    | 0    | 0.1           | 0     | 0     |
| Grass sp.3                                 | Ext                        | Grass                    | 5                  | 0    | 0    | 0.0           | 0     | 0     |
| Grass sp.4                                 | Ext                        | Grass                    | 2                  | 0    | 0    | 0.002         | 0     | 0     |
| <i>Gypsophila muralis</i> L.               | Ext                        | SmlH                     | 2                  | 0    | 0    | 0             | 0     | 0.0   |
| <i>Helianthus annuus</i> L.                | Ext                        | TalH                     | 11                 | 0    | 0    | 0.1           | 0     | 0     |
| <i>Holcus lanatus</i> L.                   | Ext                        | Grass                    | 3                  | 17   | 58   | 0.01          | 0.2   | 1.6   |
| <i>Hypochoeris radicata</i> L.             | Ext                        | TalH                     | 0                  | 0    | 2    | 0             | 0     | 0.02  |
| <i>Juglans regia</i> L.                    | Ext                        | SmlT                     | 5                  | 20   | 25   | 0.001         | 0.01  | 0.08  |
| <i>Juncus bufonius</i> L.                  | Ext                        | Grass                    | 19                 | 4    | 5    | 0.1           | 0.03  | 0.0   |
| <i>Juncus</i> sp.                          | Ext                        | Grass                    | 2                  | 4    | 4    | 0.002         | 0.03  | 0.02  |
| <i>Kickxia elatine</i> (L.) Dumort.        | Ext                        | SmlH                     | 25                 | 2    | 0    | 1             | 0.006 | 0     |
| <i>Kickxia spuria</i> (L.) Dumort.         | Ext                        | SmlH                     | 18                 | 13   | 7    | 0.04          | 0.2   | 0.04  |
| <i>Lactuca serriola</i> L.                 | Ext                        | TalH                     | 0                  | 11   | 7    | 0             | 0.4   | 0.4   |
| Lamiaceae                                  | Ext                        | SmlH                     | 1                  | 0    | 0    | 0             | 0     | 0     |
| <i>Lamium amplexicaule</i> L.              | Ext                        | SmlH                     | 0                  | 2    | 2    | 0             | 0.001 | 0     |
| <i>Lamium purpureum</i> L.                 | Ext                        | SmlH                     | 18                 | 17   | 6    | 0.009         | 0.005 | 0     |
| <i>Linaria vulgaris</i> L.                 | Ext                        | SmlH                     | 11                 | 17   | 22   | 0.02          | 0.1   | 0.6   |
| <i>Lolium perenne</i> L.                   | Ext                        | Grass                    | 18                 | 71   | 67   | 0.3           | 0.9   | 2.5   |
| <i>Lotus corniculatus</i> L.               | Ext                        | Leg                      | 23                 | 10   | 16   | 0.2           | 0.001 | 0.01  |
| <i>Lythrum salicaria</i> L.                | Ext                        | TalH                     | 0                  | 0    | 5    | 0             | 0.0   | 0     |
| <i>Malva neglecta</i> Wallroth             | Ext                        | TalH                     | 2                  | 0    | 0    | 0.008         | 0     | 0     |
| <i>Medicago lupulina</i> L.                | Ext                        | Leg                      | 3                  | 5    | 2    | 0.0           | 0.001 | 0.001 |
| <i>Medicago sativa</i> L.                  | Ext                        | Leg                      | 0                  | 1    | 2    | 0.0           | 0     | 0     |
| <i>Mentha arvensis</i> L.                  | Ext                        | SmlH                     | 0                  | 3    | 3    | 0             | 0.06  | 0.05  |
| <i>Mercurialis annua</i> L.                | Ext                        | TalH                     | 26                 | 12   | 5    | 0.3           | 0.02  | 0.04  |
| <i>Myosotis arvensis</i> (L.) Hill         | Ext                        | SmlH                     | 13                 | 10   | 8    | 0.008         | 0.003 | 0.007 |
| <i>Oenothera biennis</i> L.                | Ext                        | TalH                     | 0                  | 1    | 1    | 0             | 0     | 0     |
| <i>Orobanche</i> sp.                       | Ext                        | SmlH                     | 0                  | 3    | 2    | 0             | 0     | 0.001 |
| <i>Oxalis stricta</i> L.                   | Ext                        | SmlH                     | 20                 | 34   | 12   | 0.06          | 0.1   | 0.2   |
| <i>Phacelia tanacetifolia</i> Benth.       | Ext                        | TalH                     | 2                  | 0    | 0    | 0.008         | 0     | 0     |
| <i>Phleum pratense</i> agg.                | Ext                        | Grass                    | 6                  | 12   | 17   | 0.01          | 0.05  | 0.3   |
| <i>Phragmites australis</i> (Cav.) Trin.   | Ext                        | Grass                    | 0                  | 0    | 1    | 0             | 0     | 0     |
| <i>Plantago lanceolata</i> L.              | Ext                        | SmlH                     | 15                 | 25   | 22   | 0.08          | 0.2   | 0.3   |
| <i>Plantago major</i> L.                   | Ext                        | SmlH                     | 101                | 111  | 37   | 1.5           | 1.4   | 0.3   |
| <i>Poa annua</i> L.                        | Ext                        | Grass                    | 91                 | 27   | 3    | 1.8           | 0.5   | 0.05  |
| <i>Polygonum aviculare</i> L.              | Ext                        | SmlH                     | 27                 | 42   | 9    | 0.2           | 1.1   | 0.02  |
| <i>Polygonum mite</i> Schrank              | Ext                        | TalH                     | 33                 | 26   | 6    | 0.4           | 0.1   | 0.001 |
| <i>Polygonum</i> sp.                       | Ext                        | TalH                     | 36                 | 5    | 0    | 0.6           | 0.001 | 0     |
| <i>Populus alba</i> L.                     | Ext                        | SmlT                     | 0                  | 0    | 3    | 0             | 0     | 0     |
| <i>Portulaca oleracea</i> L.               | Ext                        | SmlT                     | 2                  | 0    | 0    | 0.002         | 0     | 0     |
| <i>Potentilla reptans</i> L.               | Ext                        | SmlH                     | 2                  | 4    | 6    | 0             | 0.006 | 0.007 |
| <i>Prunella vulgaris</i> L.                | Ext                        | SmlH                     | 0                  | 4    | 1    | 0             | 0     | 0     |
| <i>Ranunculus repens</i> L.                | Ext                        | SmlH                     | 5                  | 22   | 17   | 0.07          | 0.3   | 0.08  |

| Table S1 <i>continued</i><br>Plant species | Internal<br>or<br>External | Func-<br>tional<br>group | Number of plots in |      |      | Mean cover in |       |       |
|--------------------------------------------|----------------------------|--------------------------|--------------------|------|------|---------------|-------|-------|
|                                            |                            |                          | 2007               | 2008 | 2009 | 2007          | 2008  | 2009  |
| <i>Rubus</i> sp.                           | Ext                        | SmlH                     | 10                 | 7    | 11   | 0.07          | 0     | 1.0   |
| <i>Rumex obtusifolius</i> L.               | Ext                        | TalH                     | 68                 | 65   | 77   | 1.1           | 0.7   | 1.3   |
| <i>Rumex</i> sp.                           | Ext                        | TalH                     | 4                  | 0    | 0    | 0.0           | 0     | 0     |
| <i>Sagina apetala</i> Ard.                 | Ext                        | SmlH                     | 1                  | 1    | 0    | 0.0           | 0     | 0     |
| <i>Salix alba</i> L.                       | Ext                        | SmlT                     | 2                  | 8    | 26   | 0             | 0.007 | 0.007 |
| <i>Salix caprea</i> L.                     | Ext                        | SmlT                     | 0                  | 1    | 4    | 0             | 0     | 0.0   |
| <i>Scrophularia nodosa</i> L.              | Ext                        | TalH                     | 2                  | 1    | 6    | 0             | 0     | 0.001 |
| <i>Senecio vulgaris</i> L.                 | Ext                        | TalH                     | 25                 | 19   | 0    | 0.06          | 0.001 | 0     |
| <i>Setaria pumila</i> (Poir.) Schult.      | Ext                        | Grass                    | 36                 | 46   | 25   | 0.8           | 0.7   | 0.4   |
| <i>Sinapis alba</i> L.                     | Ext                        | TalH                     | 0                  | 1    | 0    | 0             | 0     | 0     |
| <i>Solanum nigrum</i> L.                   | Ext                        | SmlH                     | 46                 | 9    | 1    | 0.4           | 0     | 0     |
| <i>Solidago canadensis</i> L.              | Ext                        | TalH                     | 0                  | 0    | 2    | 0             | 0     | 0     |
| <i>Sonchus arvensis</i> L.                 | Ext                        | TalH                     | 80                 | 69   | 0    | 0.5           | 0.9   | 0     |
| <i>Sonchus asper</i> (L.) Hill             | Ext                        | TalH                     | 0                  | 15   | 35   | 0             | 0.09  | 0.2   |
| <i>Sonchus oleraceus</i> L.                | Ext                        | TalH                     | 12                 | 10   | 2    | 0.03          | 0.03  | 0     |
| <i>Stellaria media</i> (L.) Vill.          | Ext                        | SmlH                     | 104                | 60   | 17   | 2.3           | 0.7   | 0.02  |
| <i>Taraxacum officinale</i> Wigg           | Ext                        | SmlH                     | 66                 | 67   | 51   | 2.4           | 1.1   | 1.2   |
| <i>Taraxacum</i> sp.                       | Ext                        | SmlH                     | 1                  | 0    | 1    | 0.03          | 0     | 0     |
| <i>Thlaspi arvense</i> L.                  | Ext                        | SmlH                     | 4                  | 0    | 0    | 0.009         | 0     | 0     |
| <i>Trifolium arvense</i> L.                | Ext                        | Leg                      | 1                  | 0    | 0    | 0             | 0     | 0     |
| <i>Trifolium campestre</i> Schreb.         | Ext                        | Leg                      | 2                  | 0    | 0    | 0.009         | 0     | 0     |
| <i>Trifolium pratense</i> L.               | Ext                        | Leg                      | 19                 | 28   | 11   | 0.1           | 0.5   | 0.03  |
| <i>Trifolium repens</i> L.                 | Ext                        | Leg                      | 72                 | 60   | 36   | 1.2           | 0.8   | 0.3   |
| <i>Trifolium</i> sp.1                      | Ext                        | Leg                      | 2                  | 0    | 0    | 0.0           | 0     | 0     |
| <i>Trifolium</i> sp.2                      | Ext                        | Leg                      | 1                  | 0    | 1    | 0.0           | 0     | 0.006 |
| <i>Tripleurospermum inodorum</i> L.        | Ext                        | TalH                     | 4                  | 0    | 4    | 0.02          | 0     | 0.03  |
| <i>Triticum</i> sp.                        | Ext                        | Grass                    | 9                  | 18   | 12   | 0.03          | 0.03  | 0     |
| <i>Urtica dioica</i> L.                    | Ext                        | TalH                     | 1                  | 5    | 5    | 0             | 0     | 0     |
| <i>Veronica verna</i> L.                   | Ext                        | SmlH                     | 5                  | 0    | 0    | 0.003         | 0     | 0     |
| <i>Verbena officinalis</i> L.              | Ext                        | TalH                     | 0                  | 5    | 14   | 0             | 0.006 | 0.03  |
| <i>Veronica persica</i> Poir.              | Ext                        | SmlH                     | 94                 | 58   | 37   | 2.3           | 0.2   | 0.05  |
| <i>Veronica serpyllifolia</i> L.           | Ext                        | SmlH                     | 4                  | 4    | 1    | 0             | 0.007 | 0     |
| <i>Vicia hirsuta</i> (L.) Gray             | Ext                        | Leg                      | 6                  | 5    | 5    | 0.009         | 0     | 0.01  |
| <i>Vicia sativa</i> L.                     | Ext                        | Leg                      | 7                  | 0    | 2    | 0.01          | 0     | 0     |
| <i>Viola arvensis</i> Murray               | Ext                        | SmlH                     | 17                 | 18   | 6    | 0.1           | 0.02  | 0.001 |

**Table S2)** Mollusc abundance in relation to the meteorological data. Parameters of Generalized linear mixed effect models with a correlation structure between sessions and the traps within the wildflower strips. Significance levels at: . P < 0.1, \* P < 0.05, \*\* P < 0.01 and \*\*\* P < 0.001

|                              | Air temperature<br>(°C) | Optimum air<br>temperature (°C) <sup>2</sup> | Air humidity<br>(%) | Optimum air<br>humidity (%) <sup>2</sup> |
|------------------------------|-------------------------|----------------------------------------------|---------------------|------------------------------------------|
| Molluscs                     | -0.329                  | 0.000                                        | 1.274 **            | -1.466 ***                               |
| <i>Arion lusitanicus</i>     | -0.199                  | 0.355                                        | 0.471 .             | -0.414 .                                 |
| <i>Deroceras reticulatum</i> | -0.277                  | -0.091                                       | 0.857 *             | -1.008 **                                |
| <i>Deroceras panomitanum</i> | -0.034                  | 0.026                                        | 0.024               | -0.025                                   |

**Table S3)** Body mass analysis of the three most abundant mollusc species

---

Linear mixed-effects model fit by maximum likelihood for slug body mass

Fixed effects:

treatment + plant species richness + effective number of species + biomass +  
veg. height + year + season

---

Data: *Arion lusitanicus*

Random effects:

Formula: ~1 |wildflower strip  
Intercept Residuals  
s.d.: 3.71 9.75

---

| Fixed effects:              | Value  | Std.Error | DF  | t-value | p-value |     |
|-----------------------------|--------|-----------|-----|---------|---------|-----|
| Intercept                   | 26.83  | 4.97      | 211 | 5.40    | 0.000   |     |
| 25 mm fence                 | 1.06   | 1.45      | 211 | 0.73    | 0.467   |     |
| 8 mm fence                  | -1.86  | 2.01      | 211 | -0.93   | 0.356   |     |
| Plant species richness      | 1.10   | 0.75      | 211 | 1.47    | 0.143   |     |
| Effective number of species | -0.67  | 0.92      | 211 | -0.73   | 0.468   |     |
| Plant Biomass               | 3.44   | 1.03      | 211 | 3.33    | 0.001   | **  |
| Vegetation height           | -0.19  | 0.87      | 211 | -0.22   | 0.826   |     |
| Year 2008                   | -3.01  | 5.06      | 211 | -0.59   | 0.553   |     |
| Year 2009                   | -8.12  | 4.83      | 211 | -1.68   | 0.094   | .   |
| Season spring               | -11.43 | 1.81      | 211 | -6.33   | <0.001  | *** |

Standardized Within-Group Residuals:

| Min   | Q1    | Med   | Q3   | Max  |
|-------|-------|-------|------|------|
| -2.60 | -0.49 | -0.12 | 0.35 | 5.57 |

Number of Observations: 232

Number of Groups: 12

---

Table S3 *continued**Data: Deroceras reticulatum*

|                 |                                     |           |  |  |  |
|-----------------|-------------------------------------|-----------|--|--|--|
| Random effects: | Formula: $\sim 1$  wildflower strip |           |  |  |  |
|                 | Intercept                           | Residuals |  |  |  |
| s.d.:           | 0.19                                | 0.84      |  |  |  |

  

| Fixed effects:              | Value | Std.Error | DF  | t-value | p-value |    |
|-----------------------------|-------|-----------|-----|---------|---------|----|
| (Intercept)                 | 1.61  | 0.18      | 245 | 9.12    | 0.000   |    |
| 25 mm fence                 | -0.12 | 0.13      | 245 | -0.93   | 0.352   |    |
| 8 mm fence                  | 0.00  | 0.14      | 245 | 0.01    | 0.992   |    |
| Plant species richness      | 0.03  | 0.07      | 245 | 0.42    | 0.678   |    |
| Effective number of species | 0.01  | 0.07      | 245 | 0.16    | 0.876   |    |
| Plant biomass               | 0.03  | 0.09      | 245 | 0.32    | 0.746   |    |
| Vegetation height           | -0.08 | 0.08      | 245 | -1.02   | 0.308   |    |
| Year 2008                   | -0.77 | 0.22      | 245 | -3.53   | 0.001   | ** |
| Year 2009                   | -0.40 | 0.20      | 245 | -1.99   | 0.048   | *  |
| Season spring               | 0.00  | 0.18      | 245 | -0.03   | 0.980   |    |

Standardized Within-Group Residuals:

|       |       |       |      |      |
|-------|-------|-------|------|------|
| Min   | Q1    | Med   | Q3   | Max  |
| -1.62 | -0.57 | -0.11 | 0.33 | 6.70 |

Number of Observations: 266

Number of Groups: 12

*Data: Deroceras panormitanum*

|                 |                                     |           |  |  |  |
|-----------------|-------------------------------------|-----------|--|--|--|
| Random effects: | Formula: $\sim 1$  wildflower strip |           |  |  |  |
|                 | Intercept                           | Residuals |  |  |  |
| s.d.:           | 0.12                                | 0.45      |  |  |  |

  

| Fixed effects:              | Value | Std.Error | DF  | t-value | p-value |  |
|-----------------------------|-------|-----------|-----|---------|---------|--|
| (Intercept)                 | 0.68  | 0.14      | 137 | 4.70    | 0.000   |  |
| 25 mm fence                 | 0.03  | 0.09      | 137 | 0.39    | 0.701   |  |
| 8 mm fence                  | -0.14 | 0.10      | 137 | -1.32   | 0.188   |  |
| Plant species richness      | -0.03 | 0.05      | 137 | -0.63   | 0.533   |  |
| Effective number of species | 0.03  | 0.04      | 137 | 0.66    | 0.509   |  |
| Plant biomass               | -0.04 | 0.06      | 137 | -0.66   | 0.510   |  |
| Vegetation height           | 0.03  | 0.06      | 137 | 0.56    | 0.579   |  |
| Year 2008                   | -0.28 | 0.17      | 137 | -1.69   | 0.094   |  |
| Year 2009                   | 0.23  | 0.15      | 137 | 1.52    | 0.131   |  |
| Season spring               | -0.31 | 0.19      | 137 | -1.62   | 0.107   |  |

Standardized Within-Group Residuals:

|       |       |       |       |      |
|-------|-------|-------|-------|------|
| Min   | Q1    | Med   | Q3    | Max  |
| -1.86 | -0.64 | -0.09 | 0.371 | 4.80 |

Number of Observations: 158

Number of Groups: 12



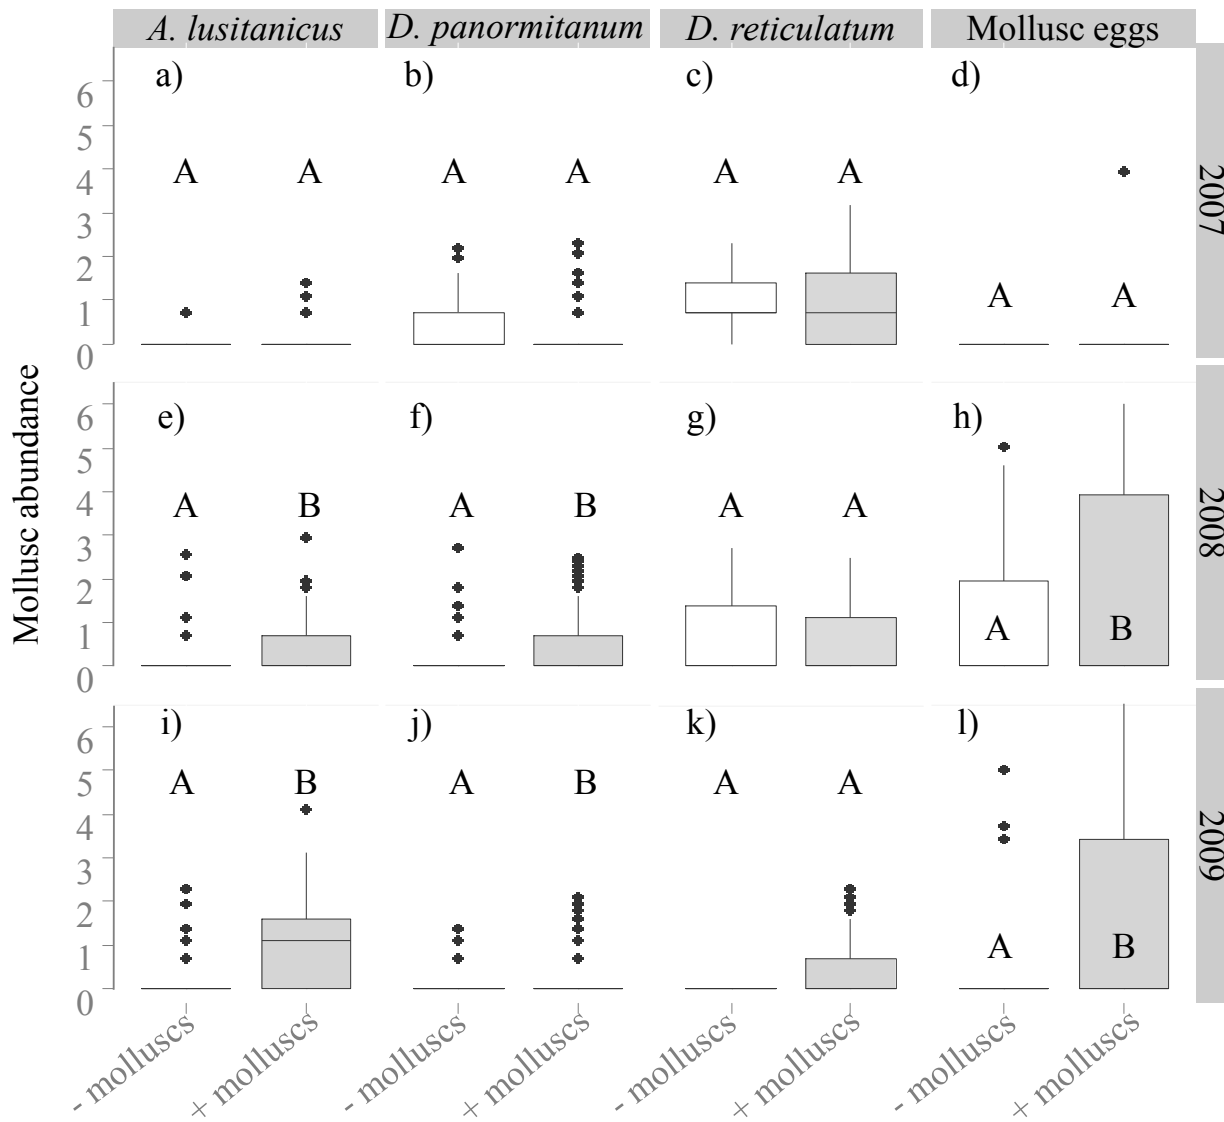

**Figure S1)** Abundances of the molluscs *A. lusitanicus*, *D. panormitanum*, *D. reticulatum* and mollusc egg abundance (left to right) in 2007, 2008 and 2009 (top to bottom) in the mollusc treatments (- white and + grey). The twelve graphs a) - l) show logarithmic means (of two seasons and twelve wildflower strips) of slug abundances for each of the three species and the mollusc eggs. Different letters A-B show significantly different slug abundances ( $P < 0.05$ ) within one species, between the mollusc treatments in the corresponding year analysed by linear mixed effect models. The box plots represent the median, the upper and lower borders of the boxes 25 and 75 quartiles and lines give the maximum and minimum. Dots indicate abundances that are considered as outliers.
